# Supplementary material for: Studies on Prn Variation in the Mouse Model and Comparison with Epidemiological Data
Source: PLoS One. 2011 Mar 25;6(3):e18014. doi: 10.1371/journal.pone.0018014 (PMC3064647; doi:10.1371/journal.pone.0018014)
Supplement: Table S2 — Analyses of variance of the effect of B. pertussis polymorphisms on colonization of the mouse lung. (XLS) [file pone.0018014.s002.xls]

## Sheet: Sheet1
Table S2. Analyses of variance of the effect of B. pertussis polymorphisms on colonization of the mouse lung1.
	Df	Sum	Sq mean	Sq F value	Pr (> F)
Fim	2	2.35	1.17	1.2271	0.29
prn	2	9.68	4.84	5.0557	0.007
ptxP	2	7.24	3.62	3.7804	0.024
ptxA	2	1.29	0.65	0.676	0.51
tcfA	1	2.75	2.75	2.8768	0.091
St: prn	1	1.06	1.06	1.1089	0.293
St: ptxP	1	0.85	0.85	0.8875	0.347
St: ptxA	1	2.26	2.26	2.362	0.125
Residuals	407	389.69	0.96
1 Colonization was assessed three days after infection.
